# Supplementary material for: Inhibitory Effects of Selected Medicinal Plants on Bacterial Growth of Methicillin-Resistant Staphylococcus aureus
Source: MDPI journal article supplement (doi:10.3390/molecules27227780), 2022-11-11
Supplement: s1 [file s1]

*Supplementary Materials*

**Inhibitory effects of selected medicinal plants on bacterial growth  
of methicillin-resistant *Staphylococcus aureus***

In Geun Jung, Jae Young Jeong, Seung Hoon Yum, You Jin Hwang

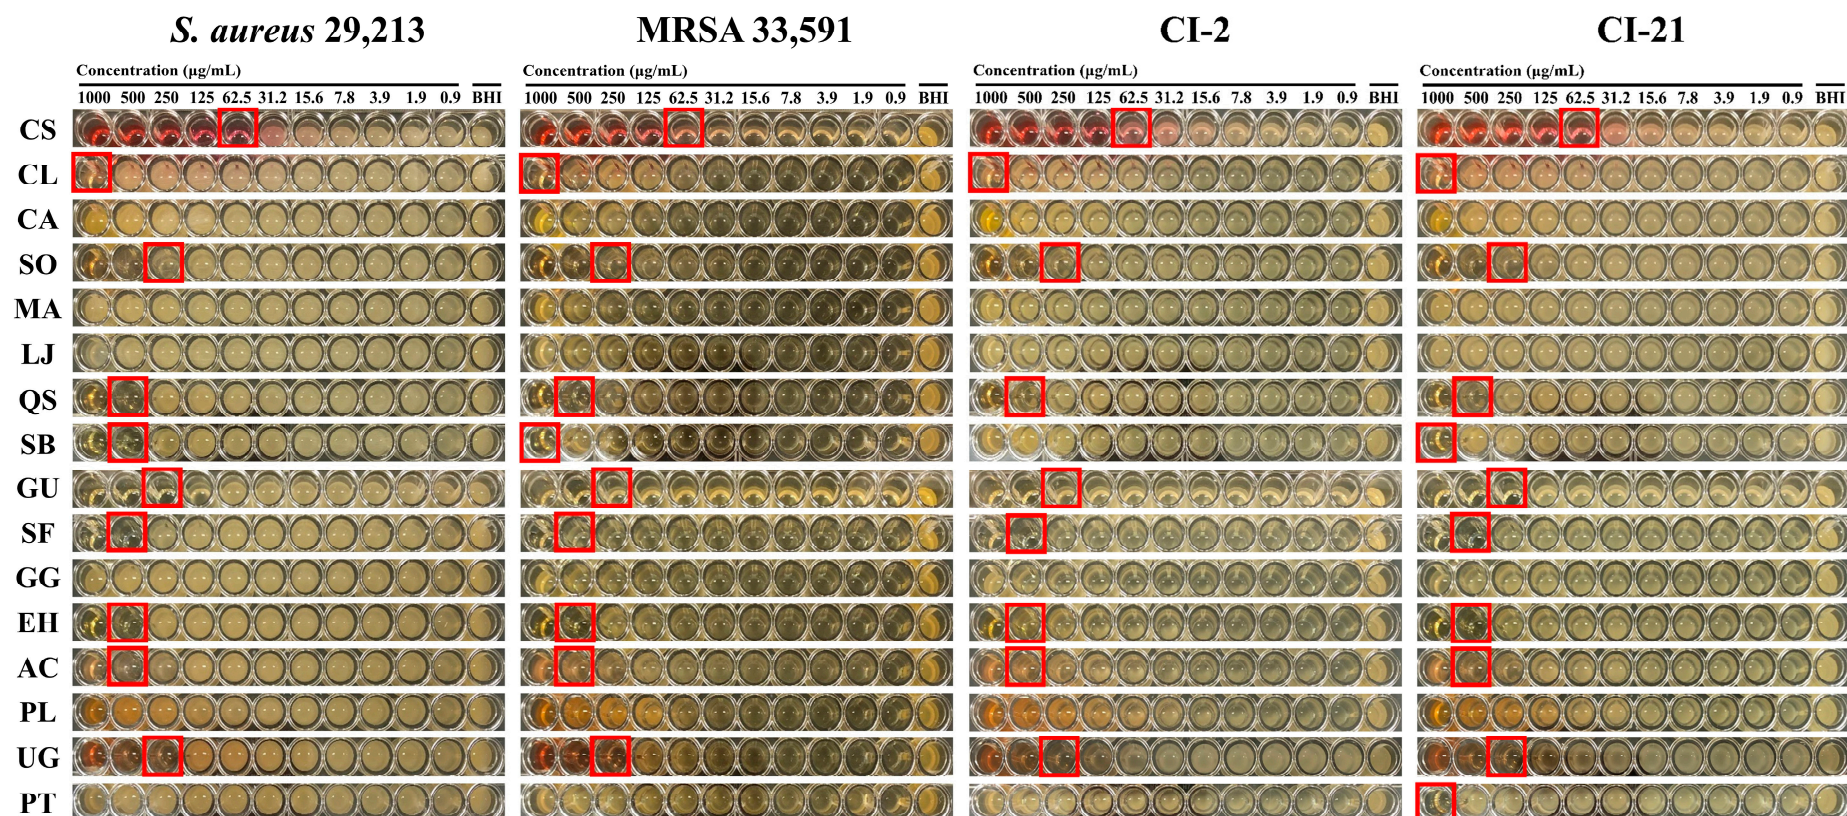

**Supplementary Figure S1. Screening of ethanol extracts from 16 medicinal plants for antibacterial activities by broth microdilution method.** Red squares are presented as MIC. *S. aureus*: *Staphylococcus aureus*; MRSA: Methicillin-resistant *Staphylococcus aureus*; CI: Clinical isolate; CS: *Caesalpinia sappan* L.; CL: *Cinnamomum loureirii* Nees.; CA: *Curcuma aromatica* Salisb.; SO: *Sanguisorba officinalis* L.; MA: *Morus alba* L.; LJ: *Lonicera japonica* Thunb; QS: *Quercus salicina* Blume; SB: *Scutellaria baicalensis* Georgi.; GU: *Glycyrrhiza uralensis* Fisch.; SF: *Sophora flavescens* Ait.; GG: *Glechoma grandis* (A. Gray) Kuprian.; EH: *Euphorbia humifusa* Wild.; AC: *Areca catechu* L.; PL: *Phellinus linteus*; UG: *Uncaria gambir* Roxb; PT: *Polygonum tinctorium* Ait.

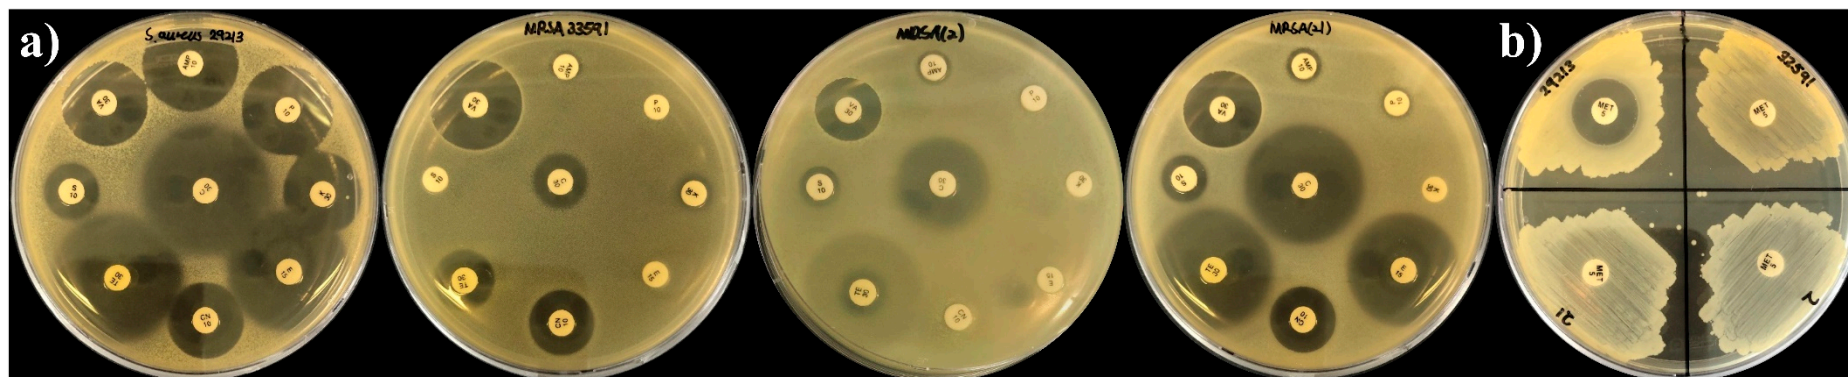

**Supplementary Figure S2. Antibiotic susceptibility testing for *S. aureus* strains.** a) Susceptibility for 9 different antibiotic discs; b) Susceptibility for methicillin antibiotic discs.



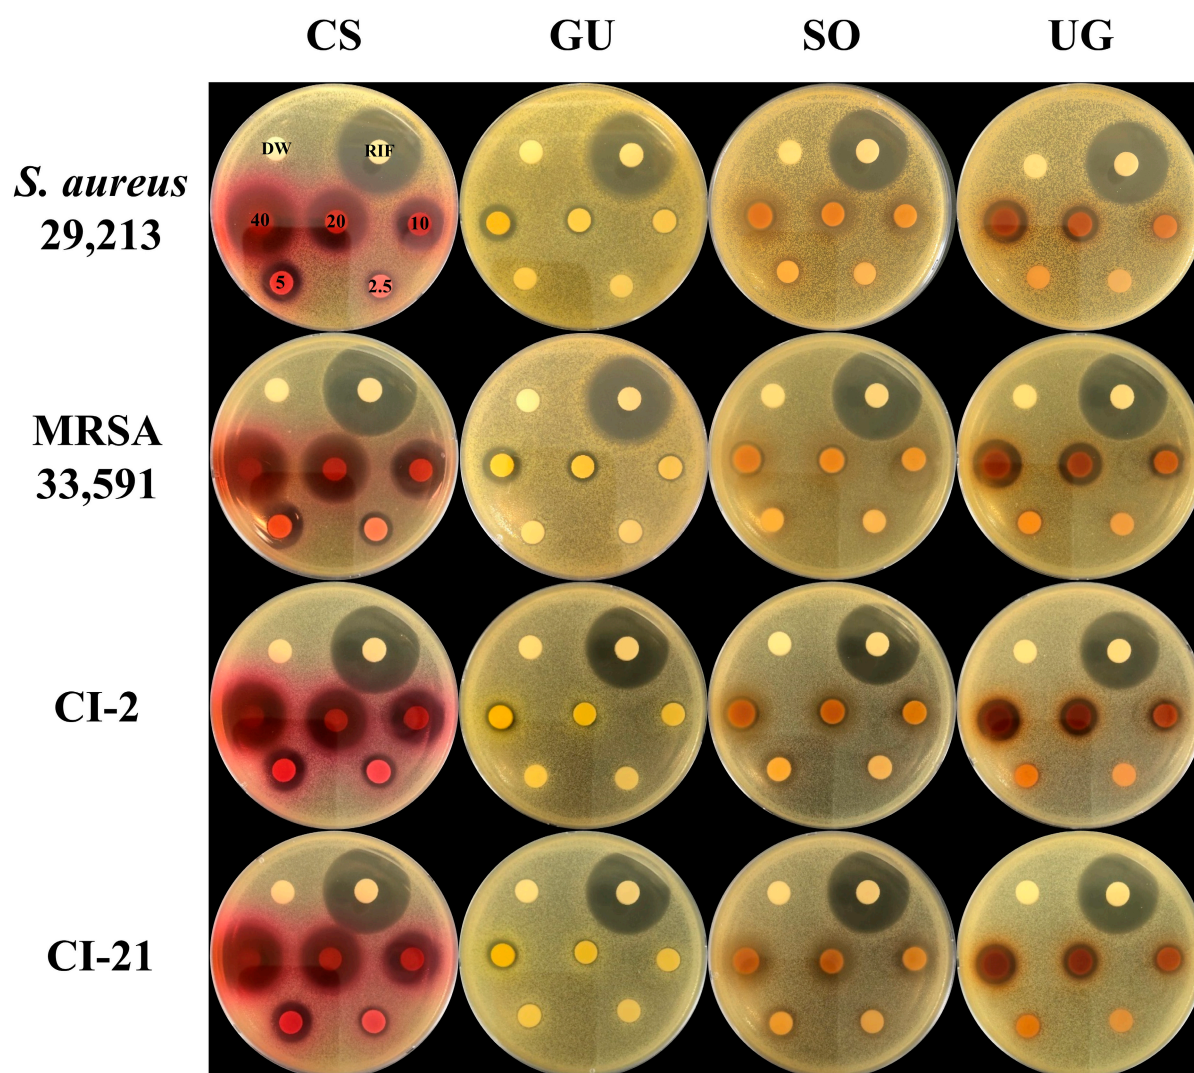

**Supplementary Figure S3. Antibacterial activities of ethanol extracts from selected medicinal plants by disc diffusion assay.** *S. aureus*: *Staphylococcus aureus*; MRSA: Methicillin-resistant *Staphylococcus aureus*; CI: Clinical isolate; CS: *Caesalpinia sappan* L.; GU: *Glycyrrhiza uralensis* Fisch.; SO: *Sanguisorba officinalis* L.; UG: *Uncaria gambir* Roxb. Briefly, each bacterial suspension ( $1 \times 10^8$  CFU/mL) was mixed well with 100 mL of fresh BHI agar medium. Then, 100  $\mu$ L of each extract was loaded onto each paper-disc (8 mm/diameter). The concentration of ethanol extracts was 40, 20, 10, 5, and 2.5 mg/mL. Distilled water (DW) was served as a negative control, while rifampicin (RIF; 30  $\mu$ L) was a positive control.



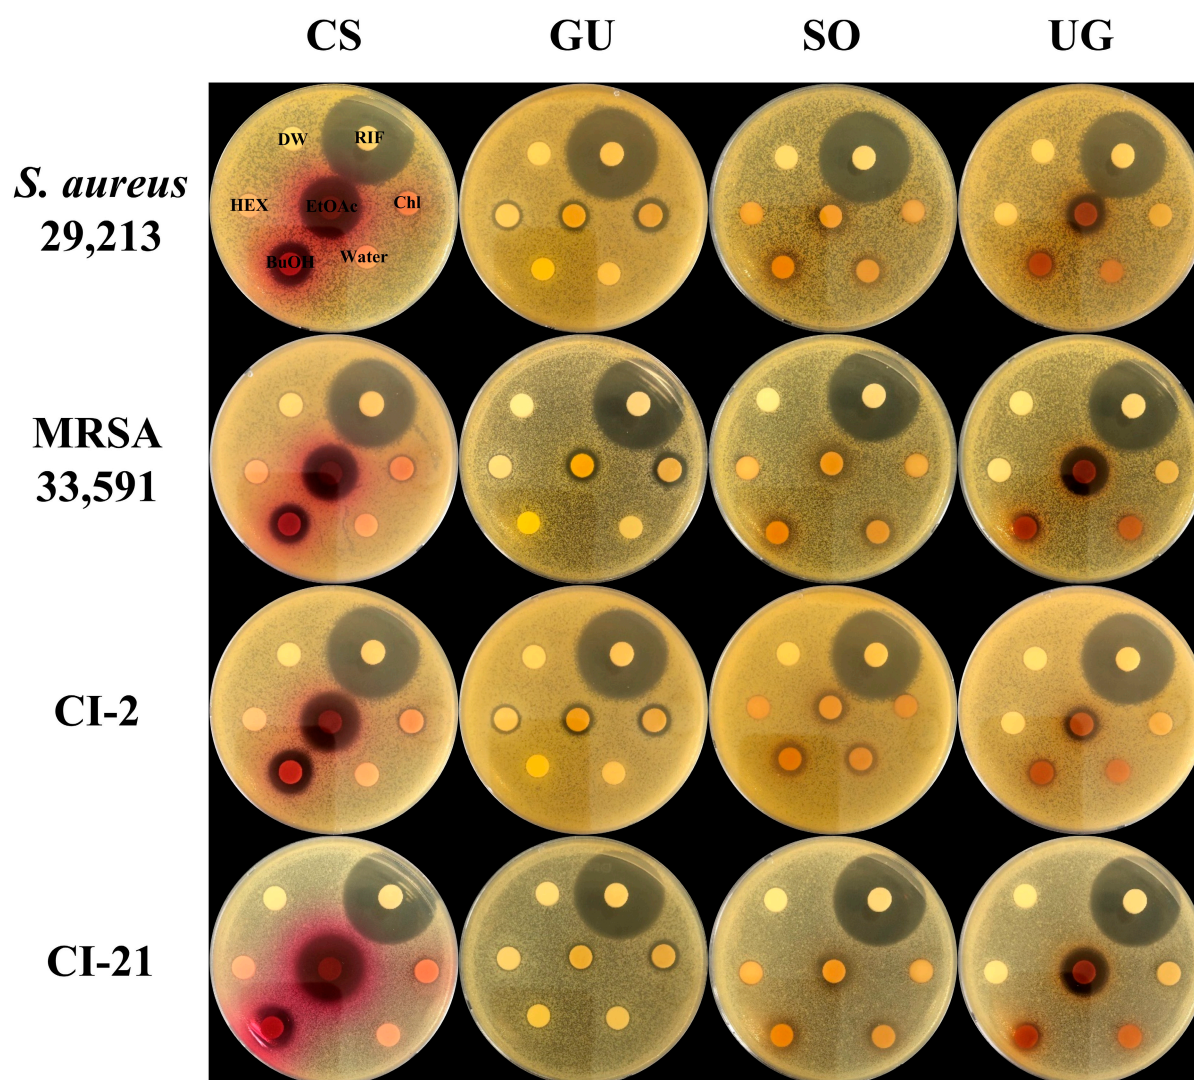

**Supplementary Figure S4. Antibacterial activities of fractions from selected medicinal plants by disc diffusion assay.** *S. aureus*: *Staphylococcus aureus*; MRSA: Methicillin-resistant *Staphylococcus aureus*; CI: Clinical isolate; CS: *Caesalpinia sappan* L.; GU: *Glycyrrhiza uralensis* Fisch.; SO: *Sanguisorba officinalis* L.; UG: *Uncaria gambir* Roxb. HEX: n-hexane; Chl: Chloroform; EtOAc: Ethyl acetate; BuOH: 1-butanol; Water: Distilled water. Briefly, each bacterial suspension ( $1 \times 10^8$  CFU/mL) was mixed well with 100 mL of fresh BHI agar medium. Then, 100  $\mu$ L of each fraction was loaded onto paper-discs (8 mm/diameter). The concentration of fractions was 10 mg/mL. Distilled water (DW) was served as a negative-control, while rifampicin (RIF; 30  $\mu$ L) was a positive-control.
